# Supplementary material for: Macular Hole Surgery Using Gas Tamponade—An Outcome from the Oslo Retrospective Cross-Sectional Study
Source: MDPI journal article supplement (doi:10.3390/jcm8050704), 2019-05-17
Supplement: s1 [file s1]

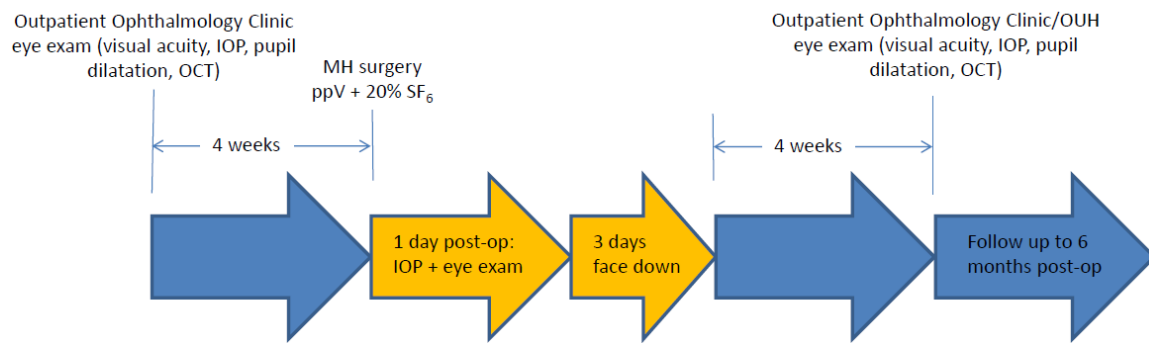

**Figure S1.** Schematic of the steps used in the treatment protocol.
